# Supplementary material for: Development of a homotrimeric PSMA radioligand based on the NOTI chelating platform
Source: PubMed Central journal article supplement (PMC11635053; doi:10.1186/s41181-024-00314-7), 2024-12-11
Supplement: 41181_2024_314_MOESM1_ESM.pdf [file 41181_2024_314_MOESM1_ESM.pdf]

## Supporting Information

### Development of a homotrimeric PSMA radioligand based on the NOTI chelating platform

Sebastian Martin<sup>1</sup>, Moritz-Valentin Schreck<sup>2</sup>, Tobias Stemler<sup>2</sup>, Stephan Maus<sup>2</sup>, Florian Rosar<sup>2</sup>, Caroline Burgard<sup>2</sup>, Andrea Schaefer-Schuler<sup>2</sup>, Samer Ezziddin<sup>2</sup> and Mark D. Bartholomä<sup>2\*</sup>

<sup>1</sup> Department of Nuclear Medicine and Molecular Imaging, Lausanne University Hospital, Rue de Bugnon 25A, CH-1011 Lausanne, Switzerland.

<sup>2</sup> Department of Nuclear Medicine, Saarland University – Medical Center, Kirrbergerstrasse, D-66421, Homburg, Germany

**\* Corresponding Author:**

Dr. Mark D. Bartholomä

Tel: +49-(6841)-16-24592

Fax: +49-(6841)-16-24692

E-mail: [mark.bartholomae@uks.eu](mailto:mark.bartholomae@uks.eu)

Orchid-Id: 0000-0002-0361-2833

## Table of Contents

|                                                                                                |    |
|------------------------------------------------------------------------------------------------|----|
| <b>HPLC chromatogramms</b> .....                                                               | 4  |
| Figure S1. Representative UV/vis RP-HPLC chromatogram of <b>1</b> .....                        | 4  |
| Figure S2. Representative UV/vis RP-HPLC chromatogram of <b>2</b> .....                        | 4  |
| Figure S3. Representative UV/vis RP-HPLC chromatogram of <b>3</b> .....                        | 5  |
| Figure S4. Representative UV/vis RP-HPLC chromatogram of <b>4</b> .....                        | 5  |
| Figure S5. Representative UV/vis RP-HPLC chromatogram of <b>7</b> .....                        | 6  |
| Figure S6. Representative UV/vis RP-HPLC chromatogram of <b>8</b> .....                        | 6  |
| Figure S7. Representative UV/vis RP-HPLC chromatogram of <b>9</b> .....                        | 7  |
| Figure S8. Representative radio-RP-HPLC chromatogram of [ <sup>68</sup> Ga]Ga- <b>7</b> .....  | 7  |
| Figure S9. Representative radio-RP-HPLC chromatogram of [ <sup>68</sup> Ga]Ga- <b>8</b> .....  | 8  |
| Figure S10. Representative radio-RP-HPLC chromatogram of [ <sup>68</sup> Ga]Ga- <b>9</b> ..... | 8  |
| Figure S11. Representative UV/vis RP-HPLC chromatogram of <sup>nat</sup> Ga- <b>7</b> .....    | 9  |
| Figure S12. Representative UV/vis RP-HPLC chromatogram of <sup>nat</sup> Ga- <b>8</b> .....    | 9  |
| Figure S13. Representative UV/vis RP-HPLC chromatogram of <sup>nat</sup> Ga- <b>9</b> .....    | 10 |
| <b>NMR data</b> .....                                                                          | 11 |
| Figure S14. <sup>1</sup> H-NMR of compound <b>1</b> in CDCl <sub>3</sub> .....                 | 11 |
| Figure S15. <sup>1</sup> H-NMR of compound <b>2</b> in d <sub>4</sub> -MeOD. ....              | 11 |
| Figure S16. <sup>1</sup> H-NMR of compound <b>3</b> in d <sub>4</sub> -MeOD. ....              | 12 |
| Figure S17. <sup>1</sup> H-NMR of compound <b>4</b> in D <sub>2</sub> O. ....                  | 12 |
| <b>Mass spectrometry data</b> .....                                                            | 13 |
| Figure S18. HR-ESI-MS of compound <b>1</b> . ....                                              | 13 |

|                                                            |    |
|------------------------------------------------------------|----|
| Figure S19. HR-ESI-MS of compound <b>2</b> .....           | 13 |
| Figure S20. HR-ESI-MS of compound <b>3</b> .....           | 14 |
| Figure S21. HR-ESI-MS of compound <b>7</b> .....           | 14 |
| Figure S22. LR-ESI-MS of compound <b>7</b> .....           | 15 |
| Figure S23. HR-ESI-MS of compound <b>8</b> .....           | 15 |
| Figure S24. LR-ESI-MS of compound <b>8</b> .....           | 15 |
| Figure S25. HR-ESI-MS of compound <b>9</b> .....           | 16 |
| Figure S26. LR-ESI-MS of compound <b>9</b> .....           | 16 |
| Figure S27. HR-ESI-MS of <sup>nat</sup> Ga- <b>7</b> ..... | 17 |
| Figure S28. HR-ESI-MS of <sup>nat</sup> Ga- <b>8</b> ..... | 17 |
| Figure S29. HR-ESI-MS of <sup>nat</sup> Ga- <b>9</b> ..... | 18 |

## HPLC chromatograms

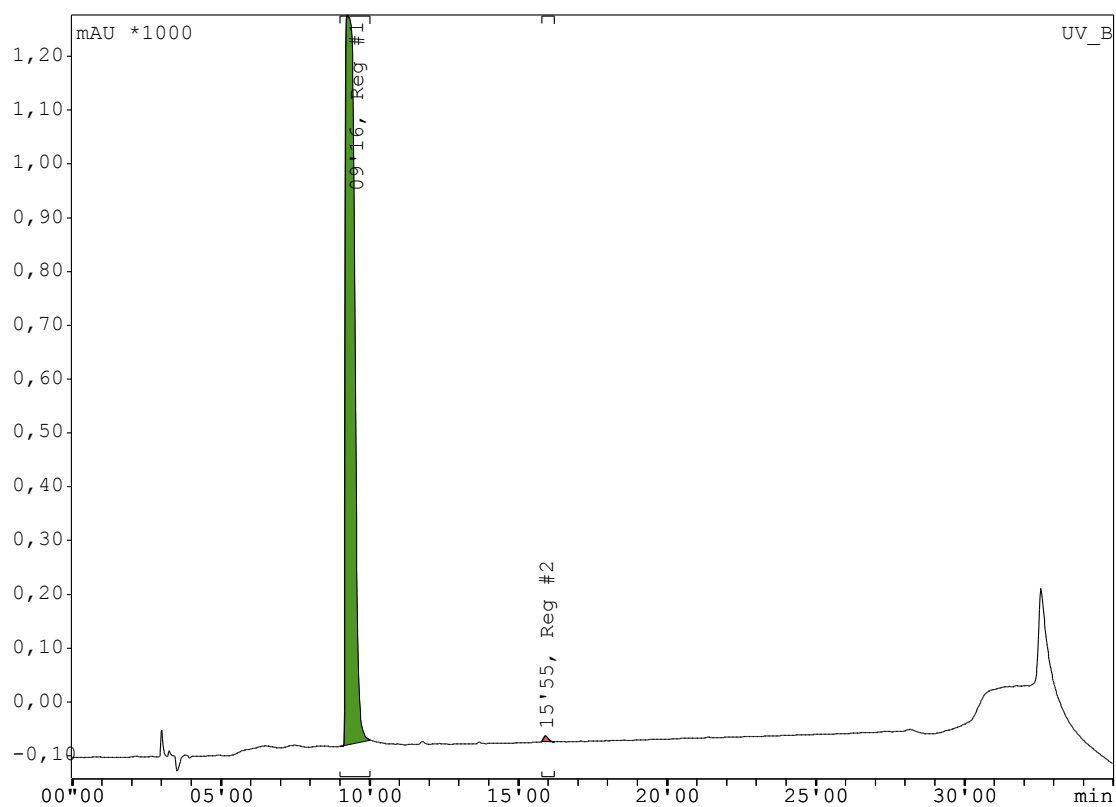

Figure S1. Representative UV/vis RP-HPLC chromatogram of **1**.

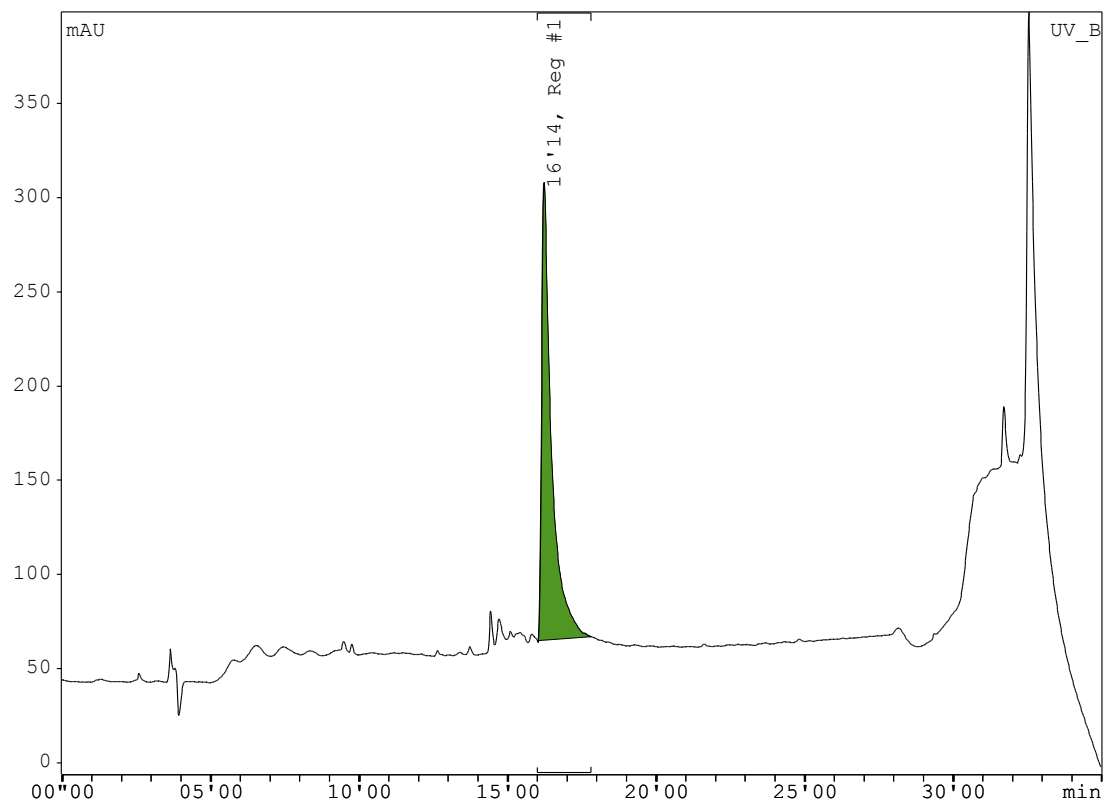

Figure S2. Representative UV/vis RP-HPLC chromatogram of **2**.

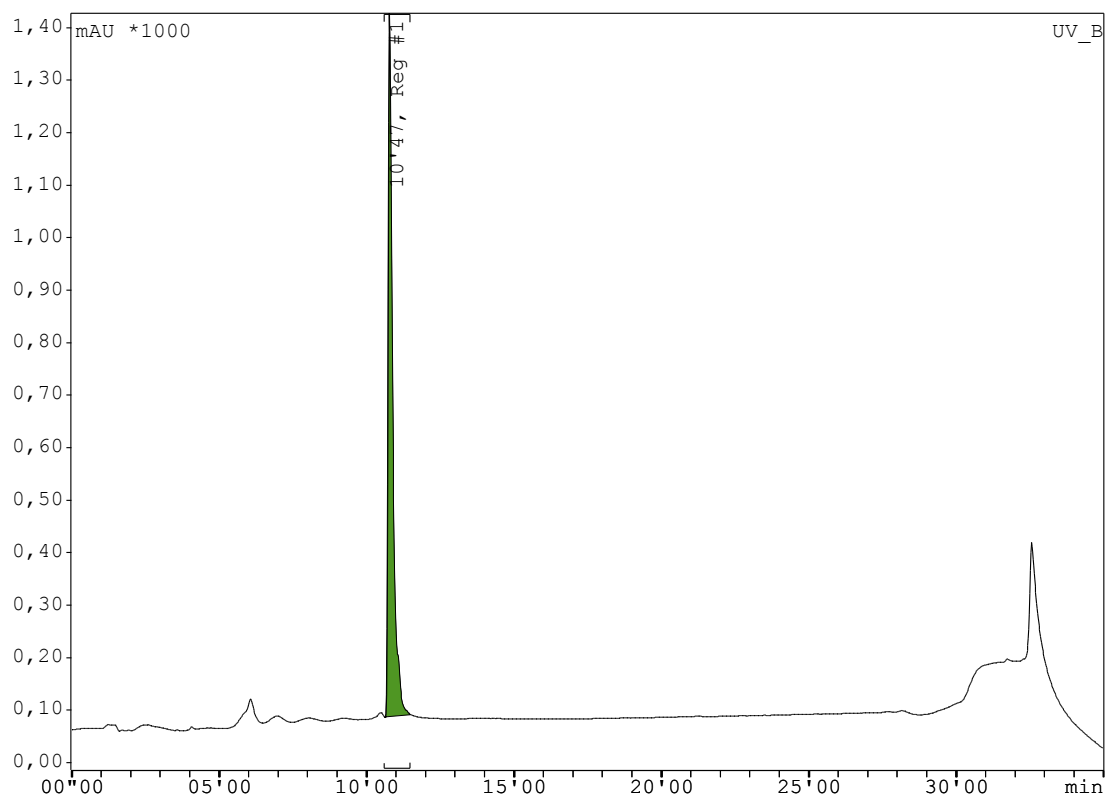

Figure S3. Representative UV/vis RP-HPLC chromatogram of **3**.

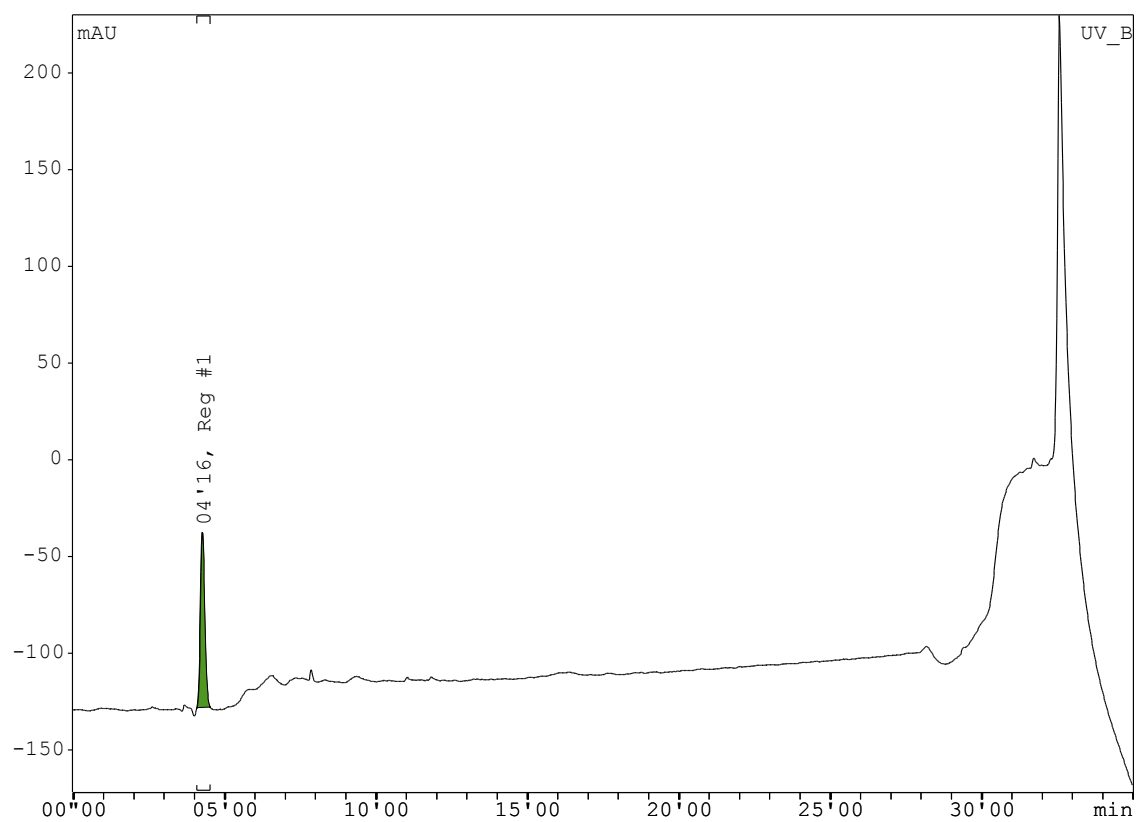

Figure S4. Representative UV/vis RP-HPLC chromatogram of **4**.

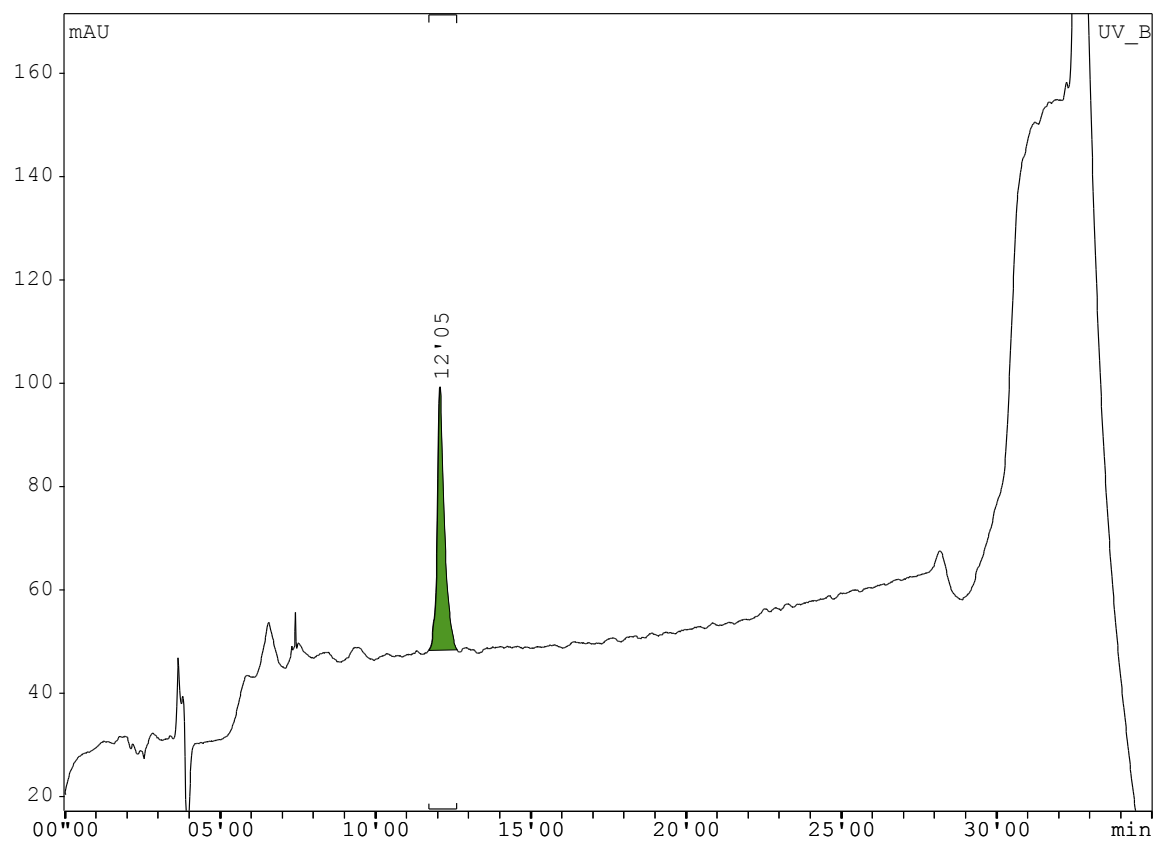

Figure S5. Representative UV/vis RP-HPLC chromatogram of **7**.

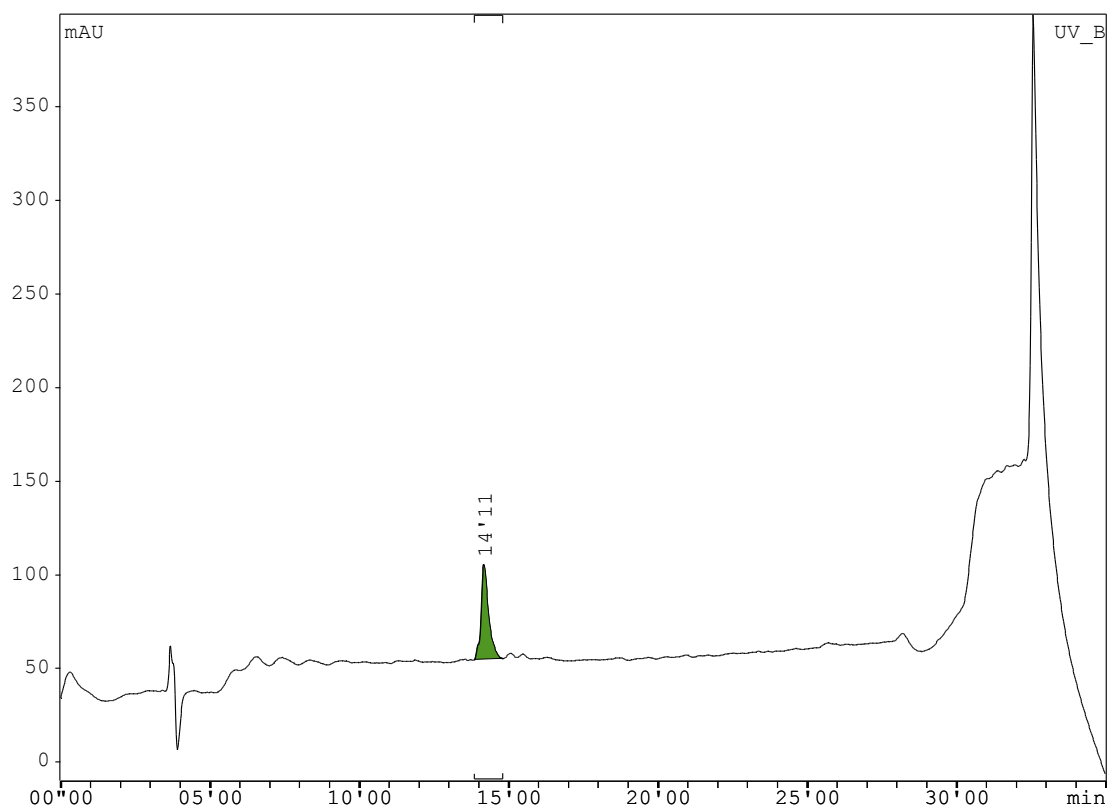

Figure S6. Representative UV/vis RP-HPLC chromatogram of **8**.

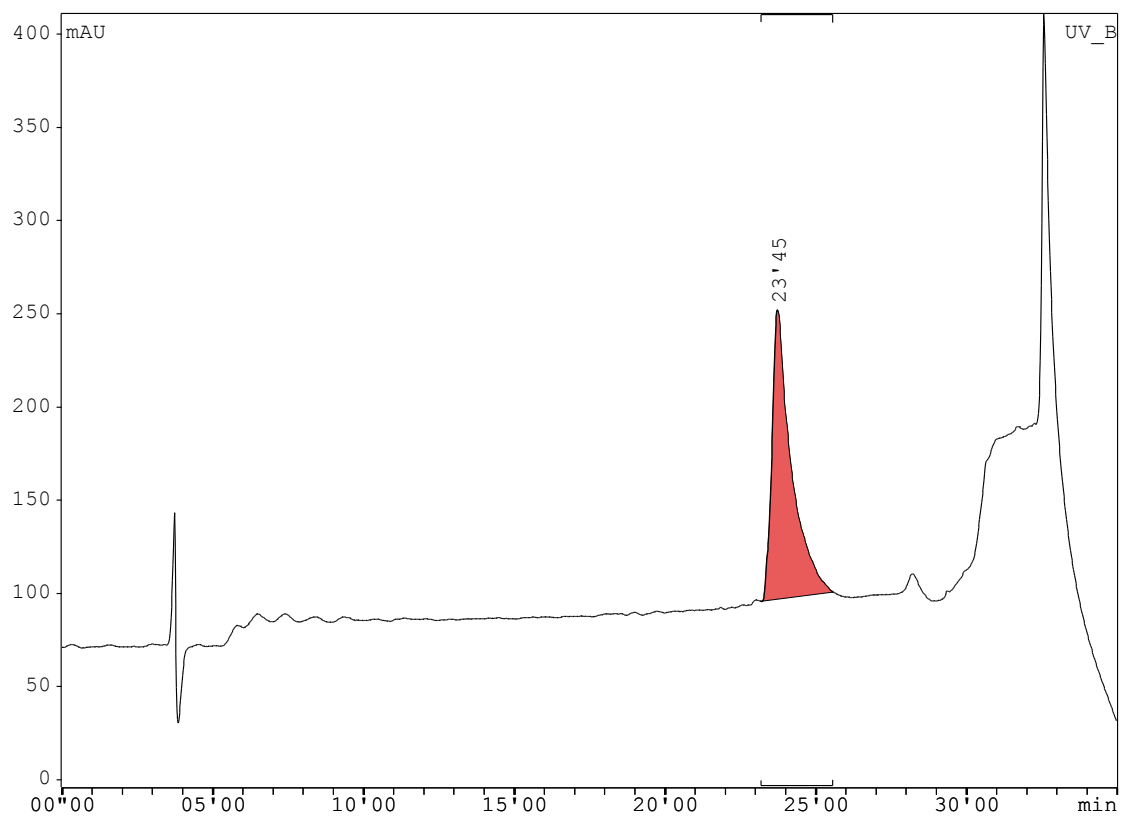

Figure S7. Representative UV/vis RP-HPLC chromatogram of **9**.

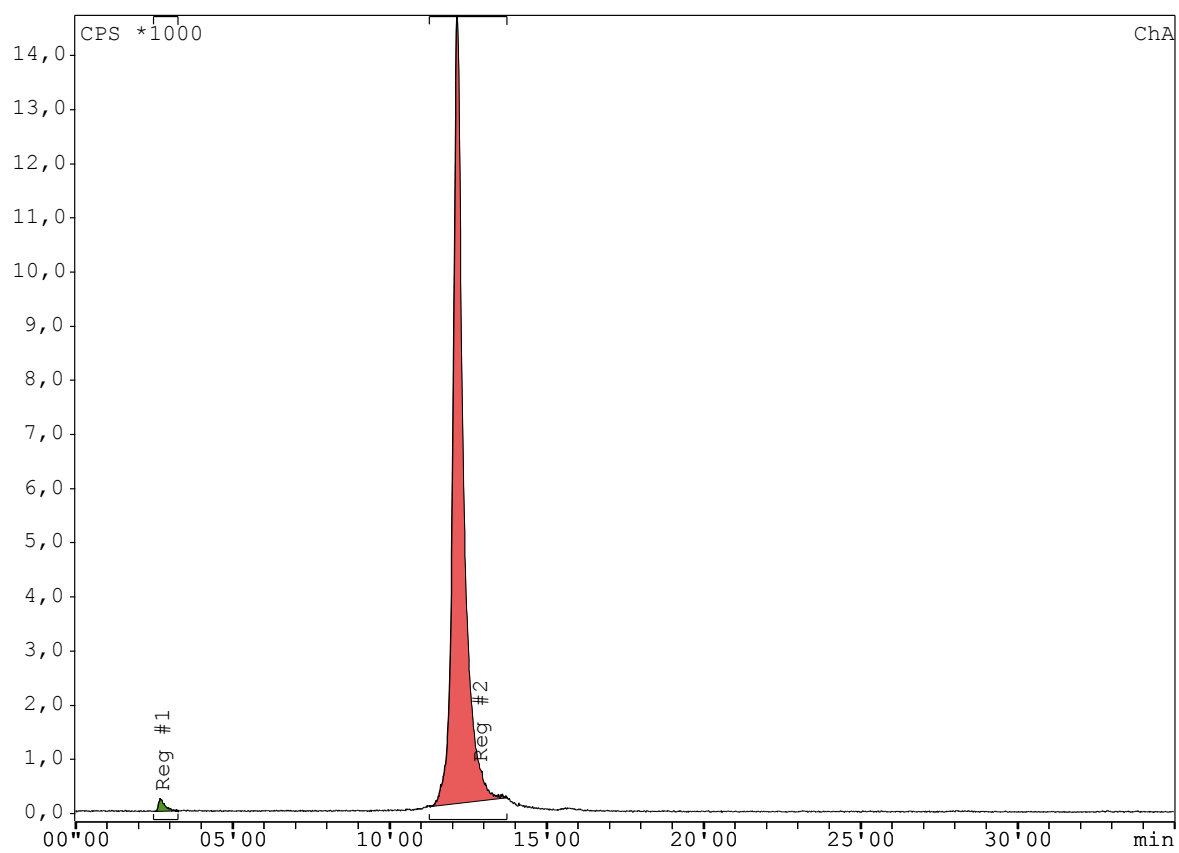

Figure S8. Representative radio-RP-HPLC chromatogram of [<sup>68</sup>Ga]Ga-7.

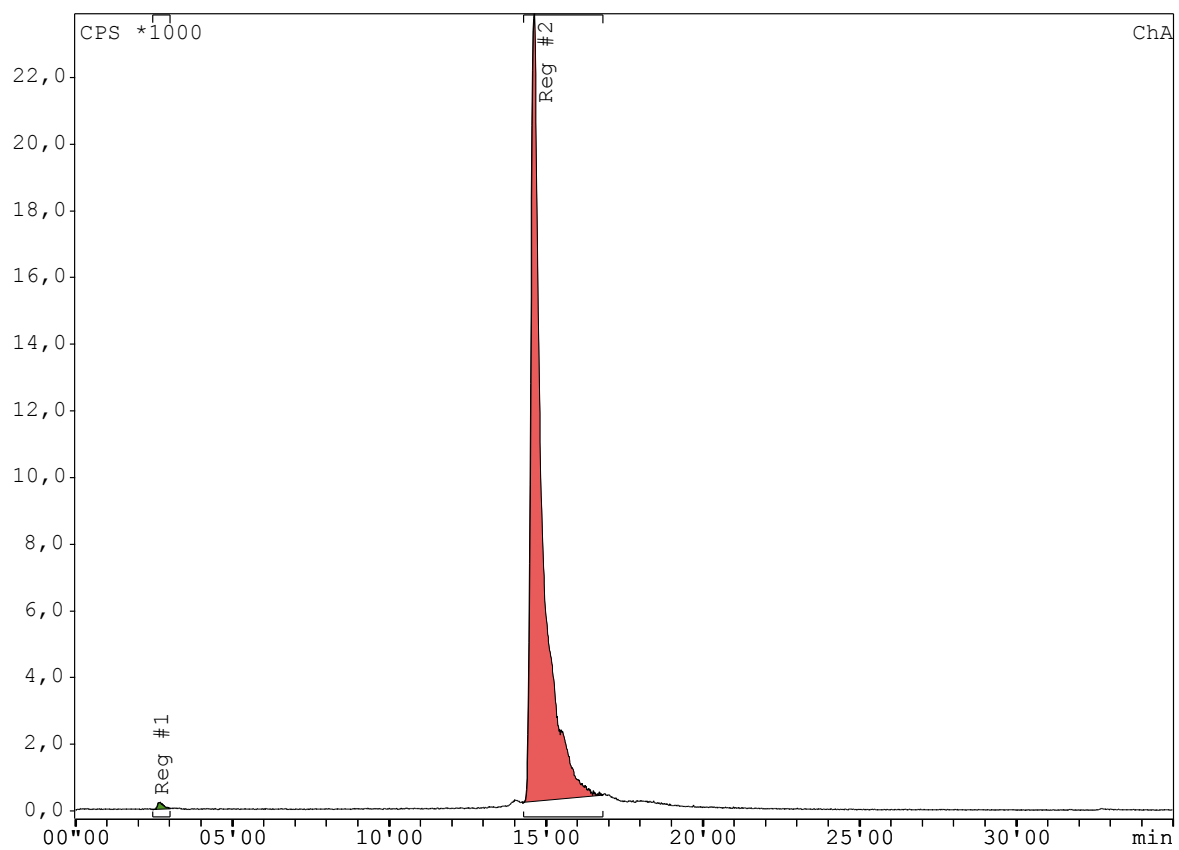

Figure S9. Representative radio-RP-HPLC chromatogram of [ $^{68}\text{Ga}$ ]Ga-8.

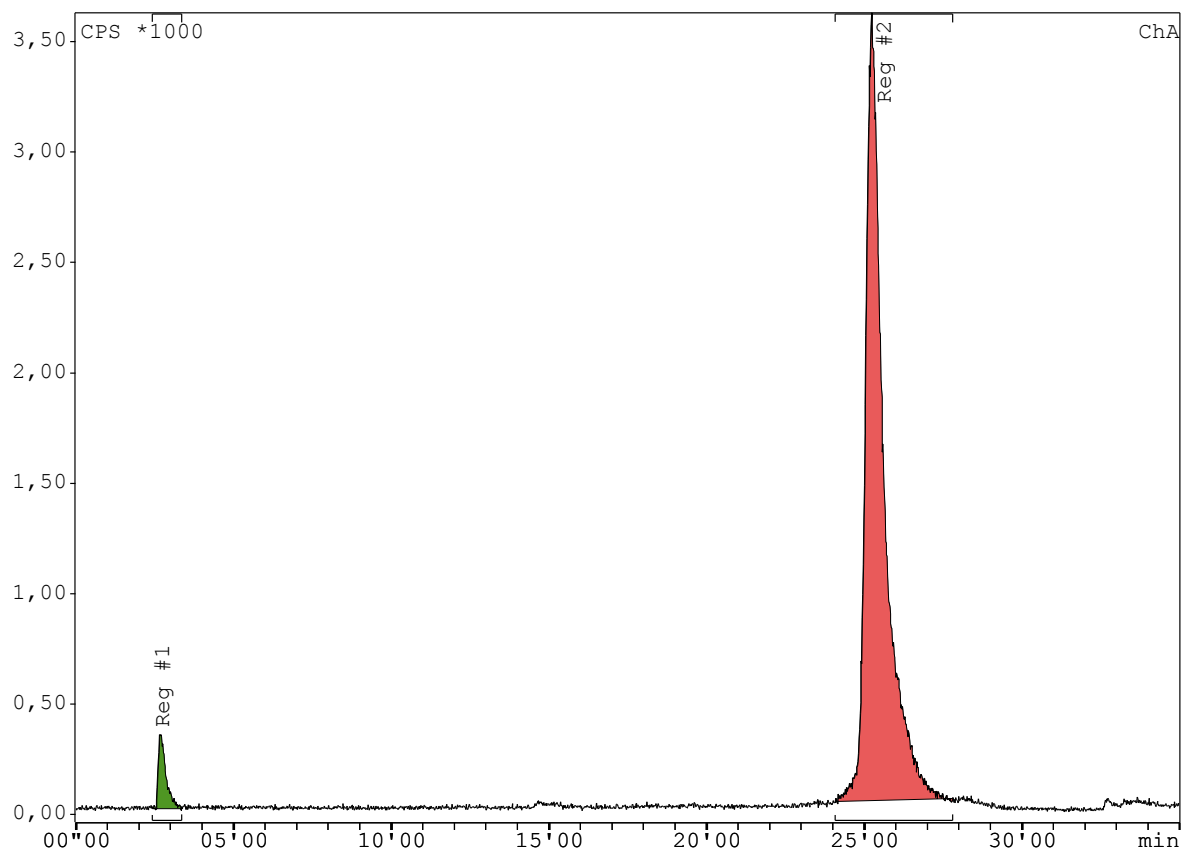

Figure S10. Representative radio-RP-HPLC chromatogram of [ $^{68}\text{Ga}$ ]Ga-9.



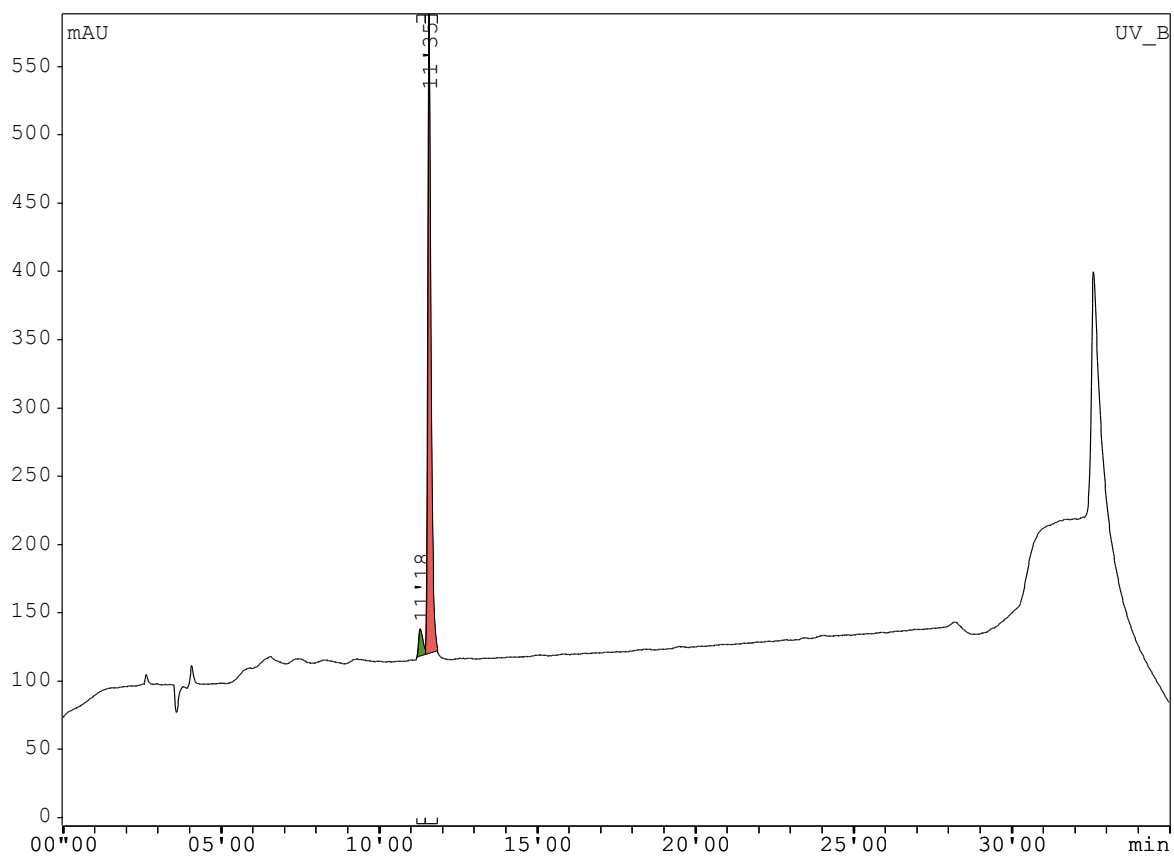

Figure S11. Representative UV/vis RP-HPLC chromatogram of <sup>nat</sup>Ga-7.

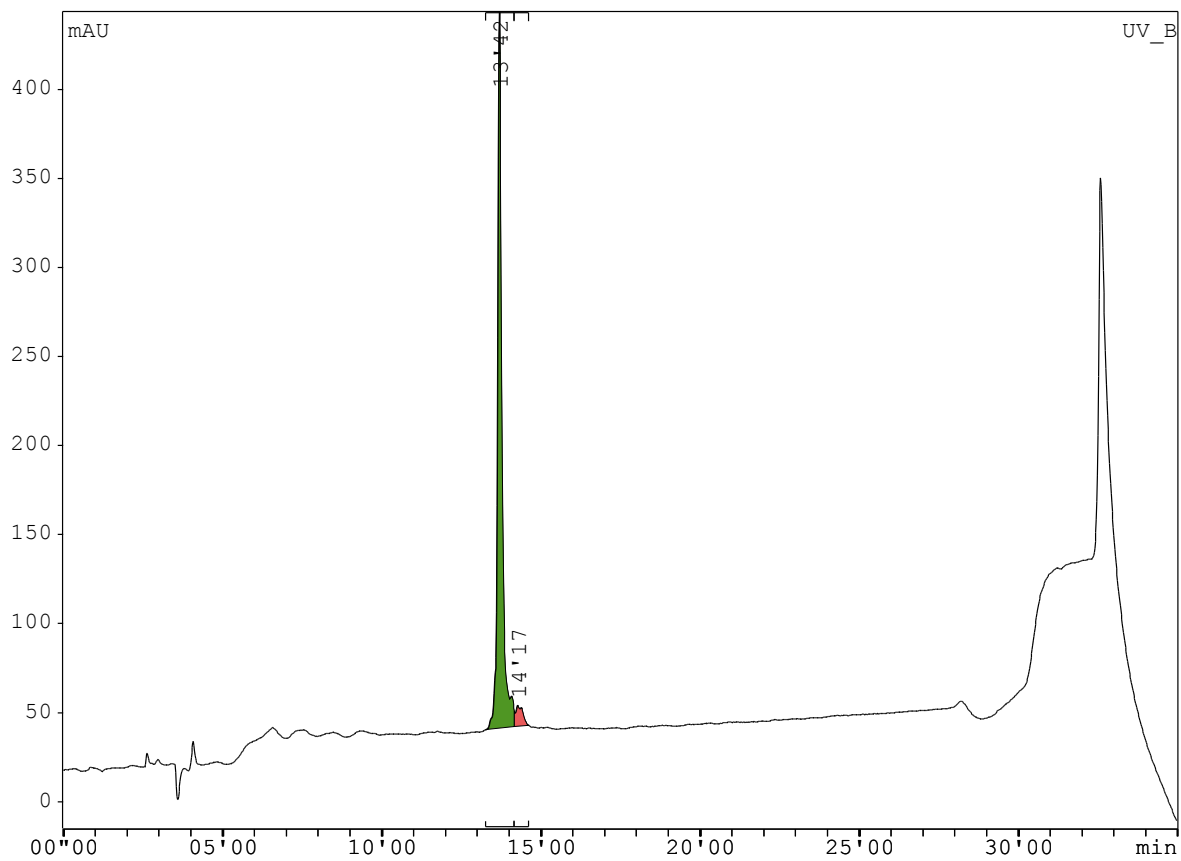

Figure S12. Representative UV/vis RP-HPLC chromatogram of <sup>nat</sup>Ga-8.

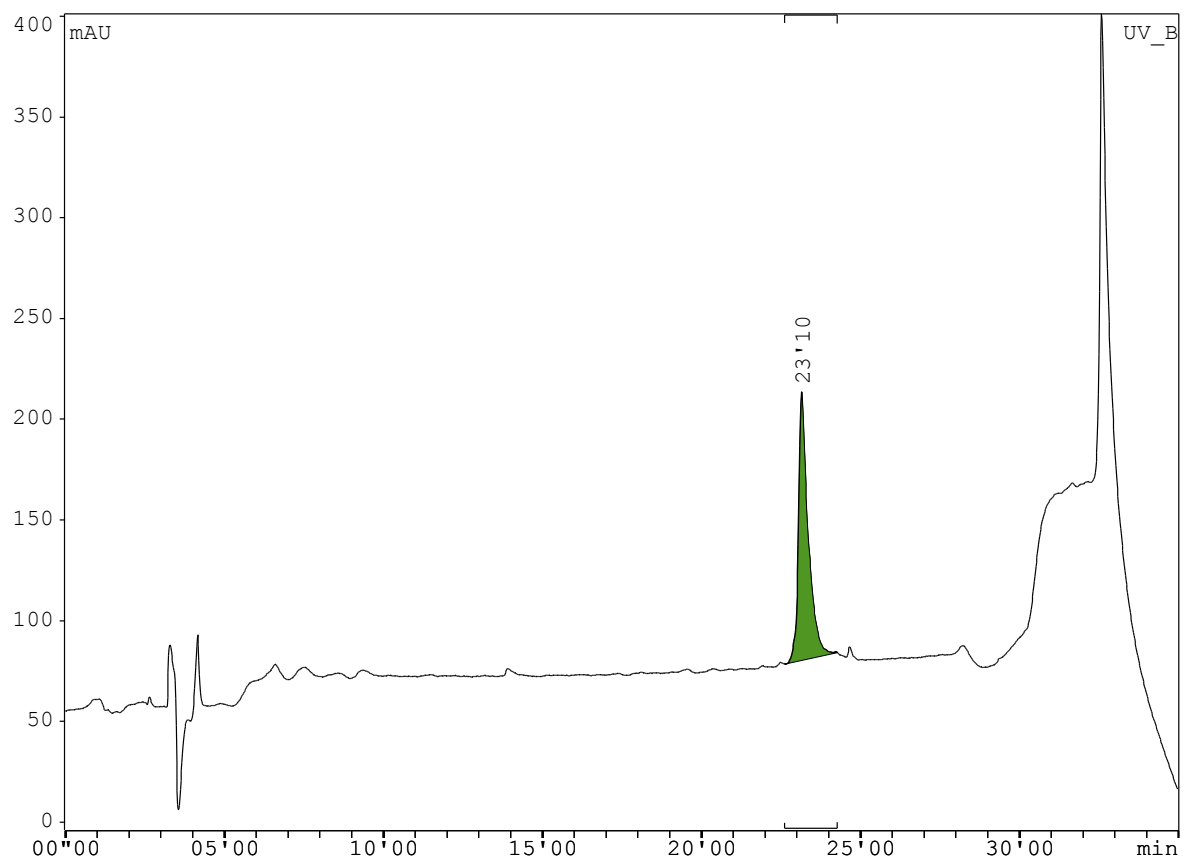

Figure S13. Representative UV/vis RP-HPLC chromatogram of <sup>nat</sup>Ga-9.

## NMR data

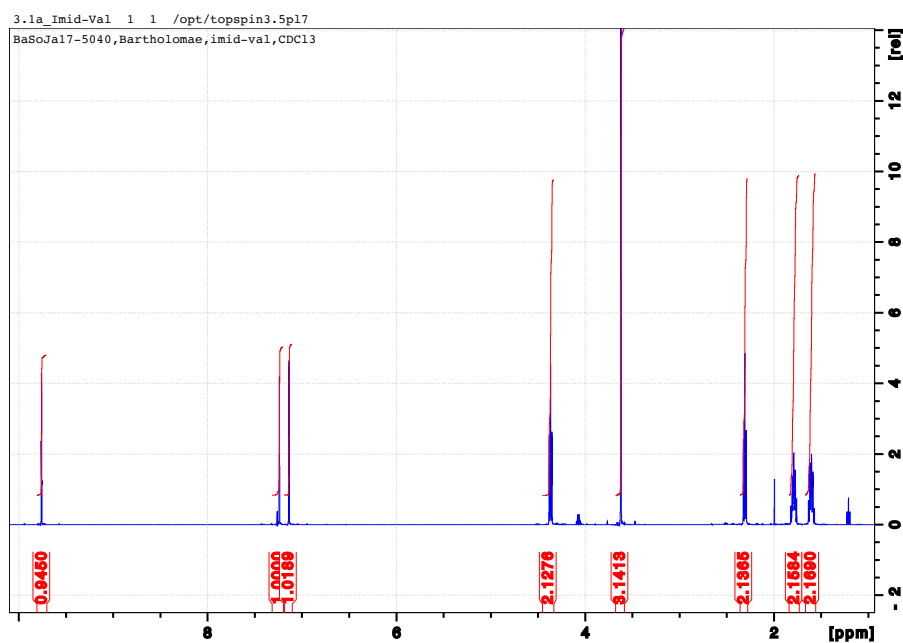

Figure S14.  $^1\text{H}$ -NMR of compound **1** in  $\text{CDCl}_3$ .

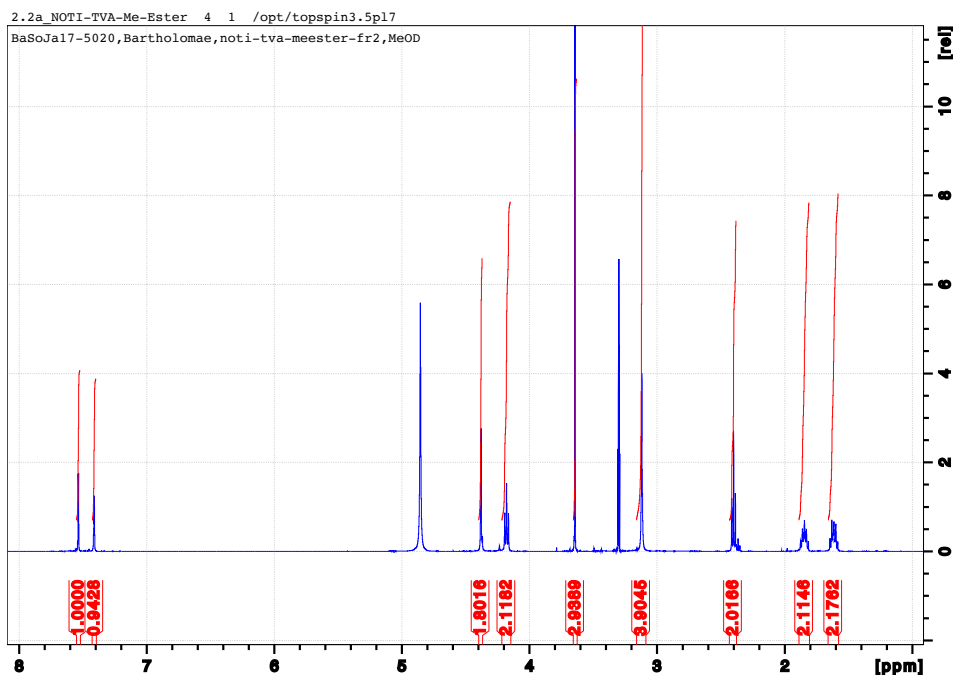

Figure S15.  $^1\text{H}$ -NMR of compound **2** in  $d_4\text{-MeOD}$ .

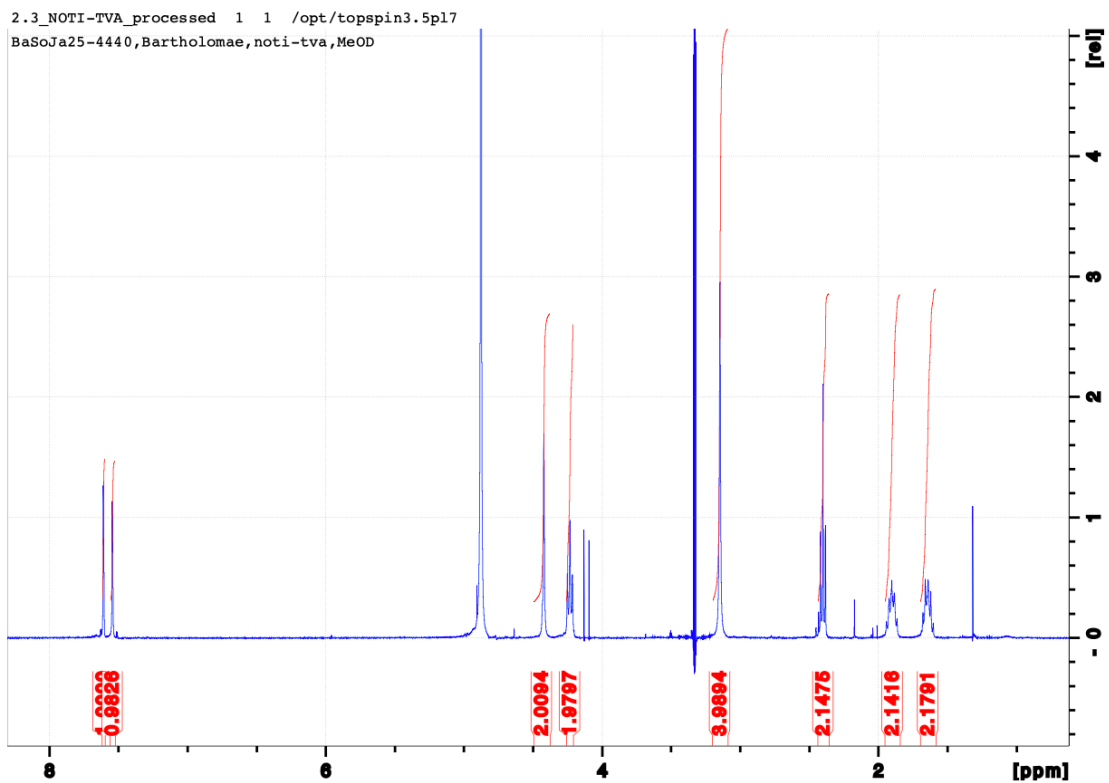

Figure S16.  $^1\text{H-NMR}$  of compound 3 in  $\text{d}_4\text{-MeOD}$ .

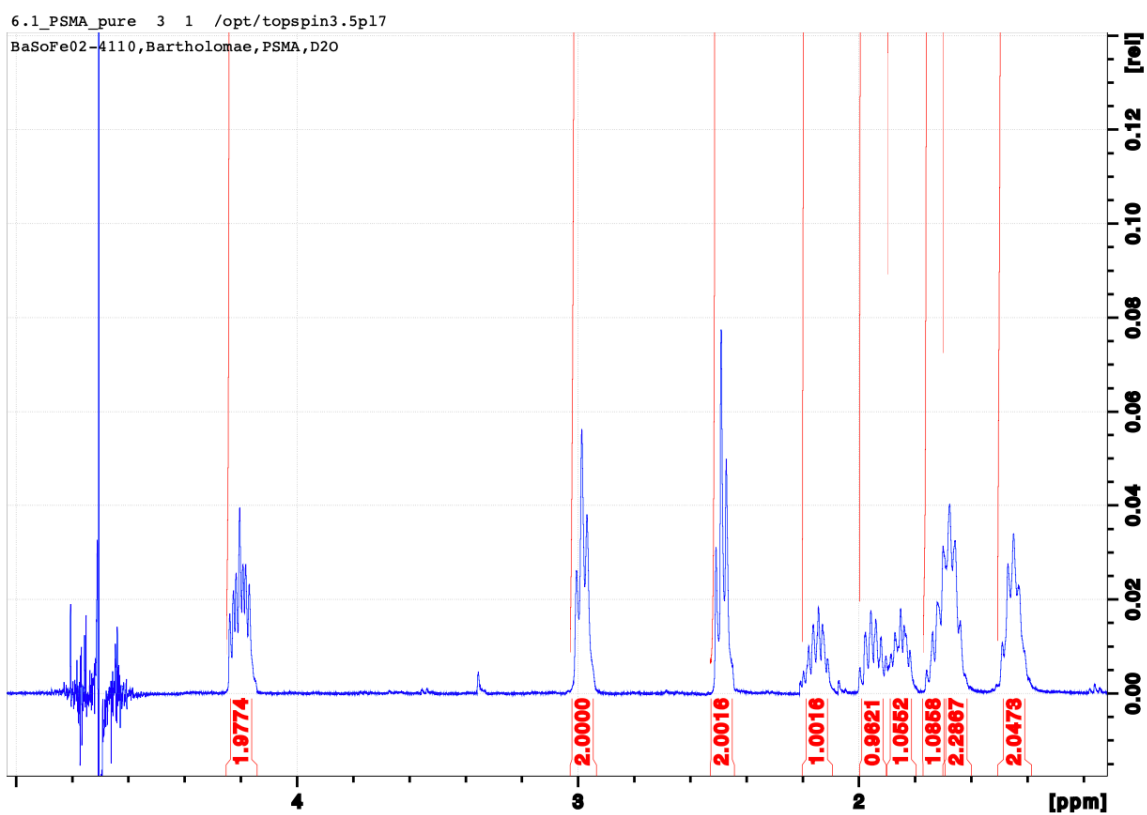

Figure S17.  $^1\text{H-NMR}$  of compound 4 in  $\text{D}_2\text{O}$ .

# Mass spectrometry data

D:\data\_2018\klind32s\_hr03

2/15/2018 2:54:48 PM

ms.ms.vnl

klind32s\_hr03 #1 RT: 0.00 AV: 1 NL: 6.14E7  
T: FTMS + p ESI Full lock ms [50.00-700.00]

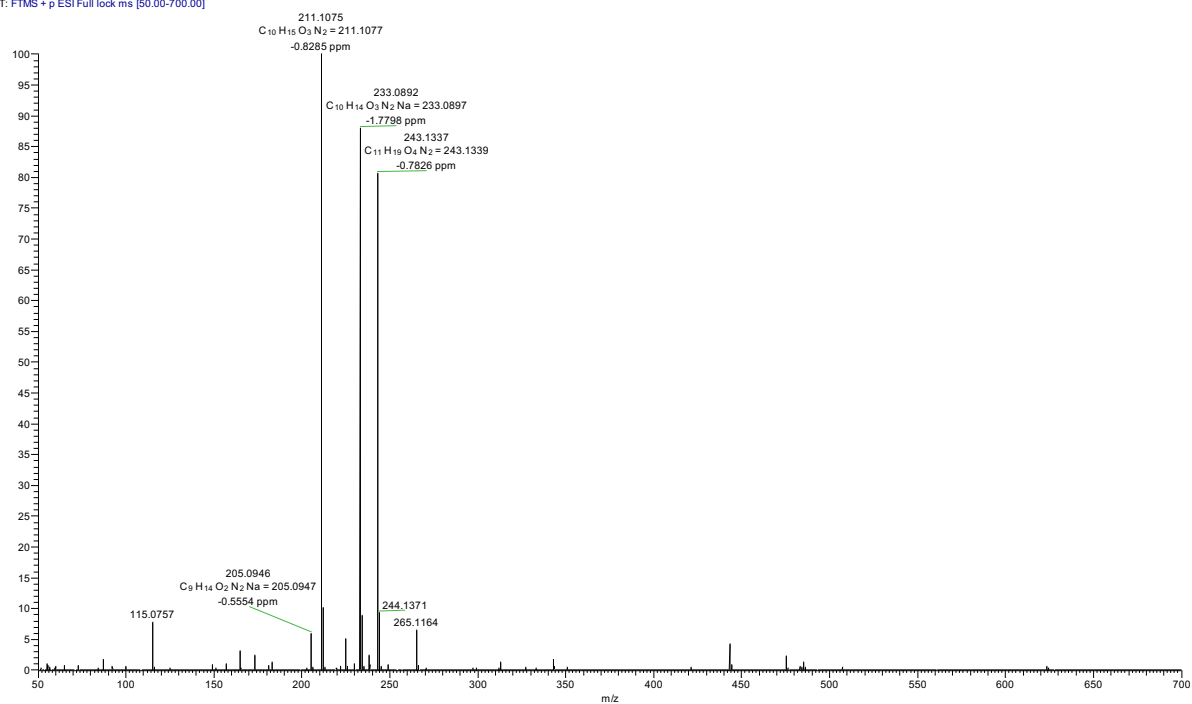

Figure S18. HR-ESI-MS of compound 1.

D:\data\_2018\klind23s\_hr04

1/29/2018 10:26:51 AM

ms.ms.est

klind23s\_hr04 #1 RT: 0.00 AV: 1 NL: 8.20E7  
T: FTMS + p ESI Full ms [100.00-2000.00]

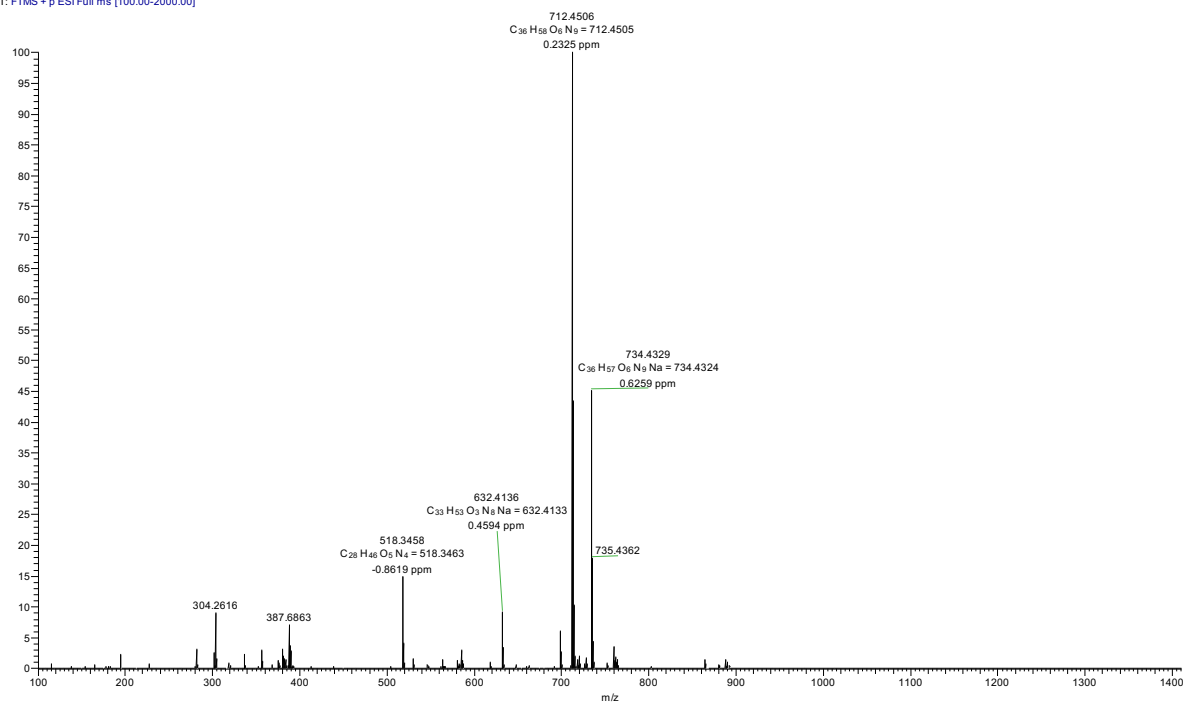

Figure S19. HR-ESI-MS of compound 2.

klind24s\_hr05 #1 RT: 0.00 AV: 1 NL: 3.84E7  
T: FTMS + p ESI Full ms [100.00-1400.00]

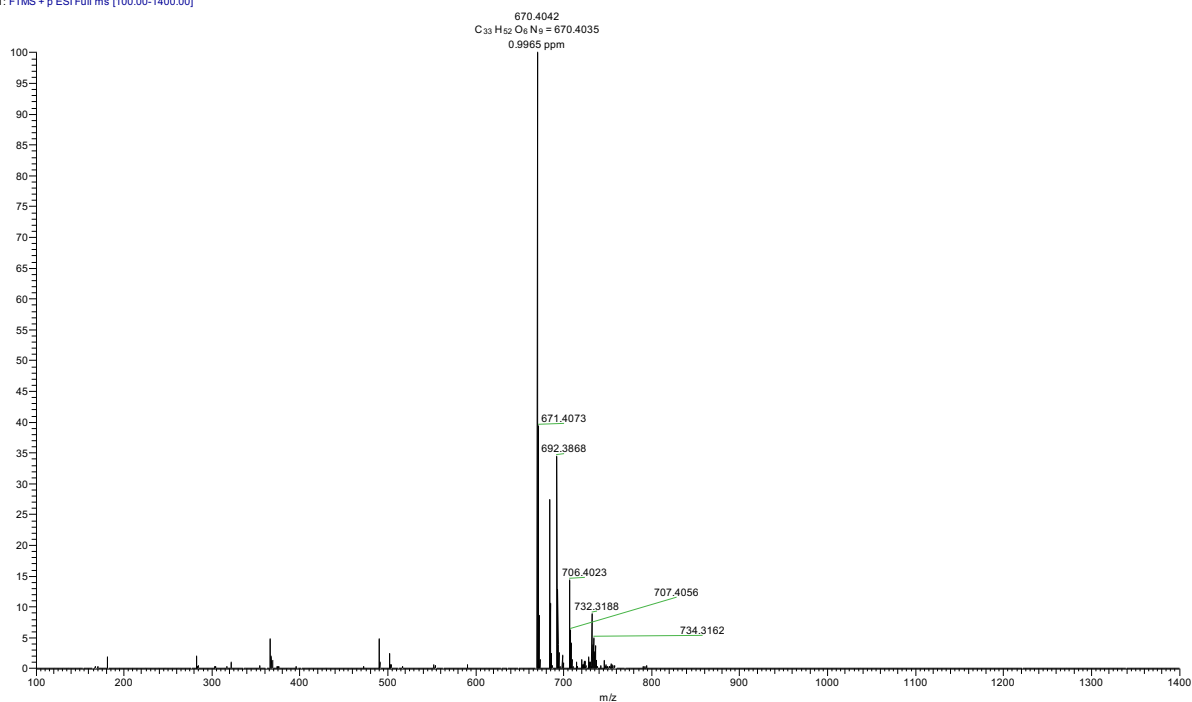

Figure S20. HR-ESI-MS of compound 3.

klind33s\_hr02 #1 RT: 0.02 AV: 1 NL: 1.65E6  
T: FTMS - p ESI Full lock ms [200.00-1000.00]

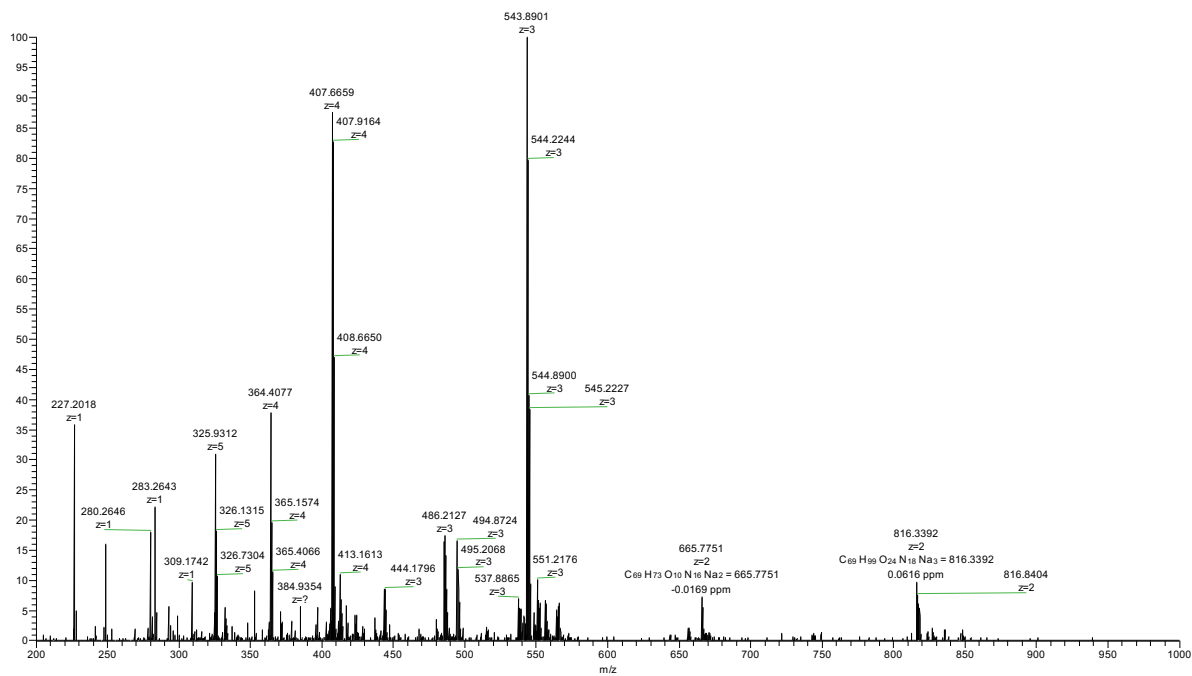

Figure S21. HR-ESI-MS of compound 7.



klind35s\_hr06 #1 RT: 0.02 AV: 1 NL: 3.83E6  
T: FTMS - p ESI Full lock ms [400.00-1200.10]

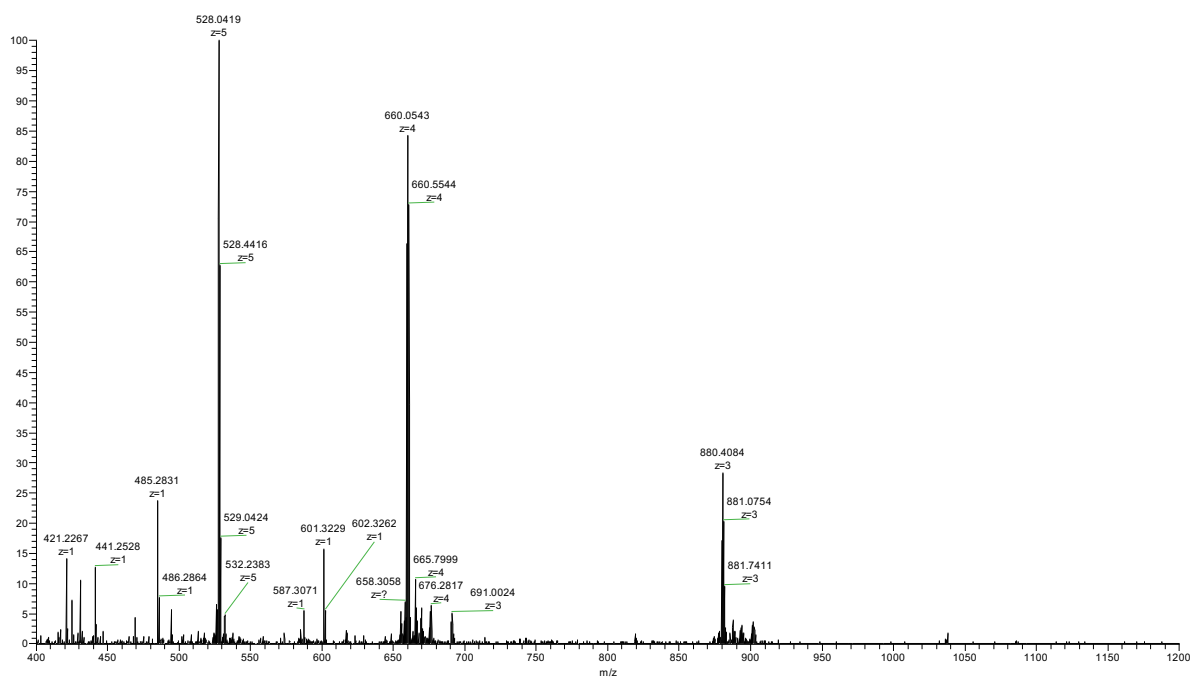

Figure S25. HR-ESI-MS of compound 9.

Spectrum RT 0:32 - 0:52 (49 scans) - Background Subtracted 0:04 - 0:20  
2024\_8\_6\_16\_10\_18\_NOTI-TVA-tPSMA.datx;  
ESI + Max: 1.8E6

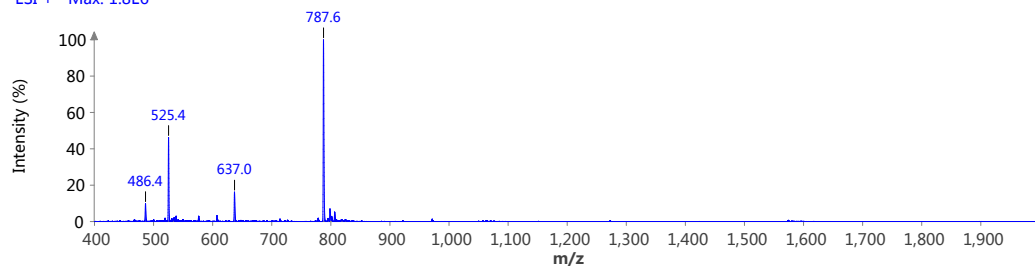

Figure S26. LR-ESI-MS of compound 9.



klind36s\_hr03 #1 RT: 0.02 AV: 1 NL: 5.02E6  
T: FTMS + p ESI Full lock ms [100.00-2000.00]

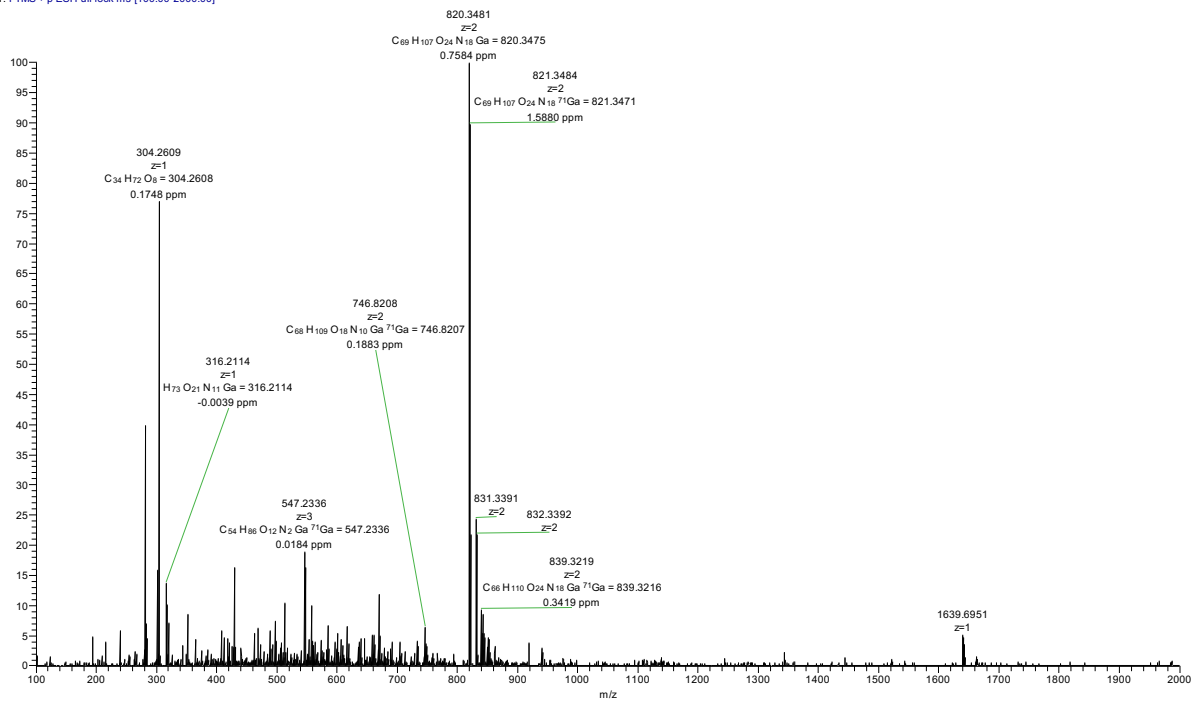

Figure S27. HR-ESI-MS of  $^{nat}\text{Ga-7}$ .

klind37s\_hr03 #1 RT: 0.02 AV: 1 NL: 7.80E6  
T: FTMS + p ESI Full lock ms [100.00-2000.00]

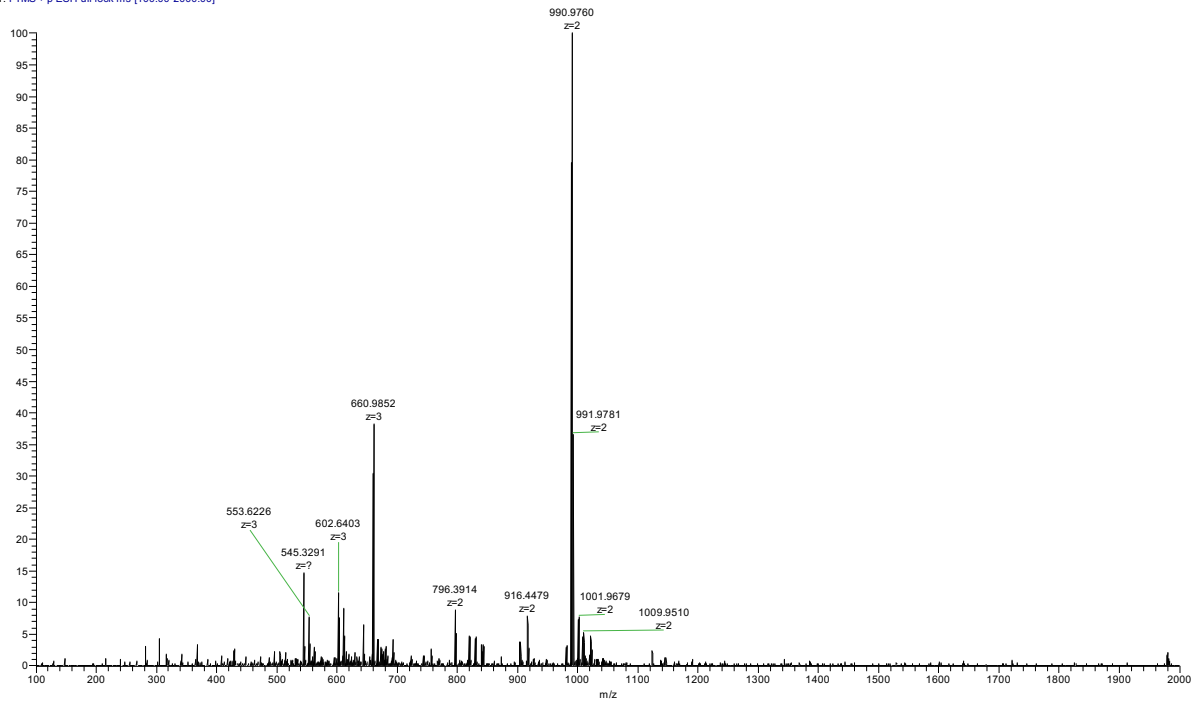

Figure S28. HR-ESI-MS of  $^{nat}\text{Ga-8}$ .

klind38s\_hr04 #1 RT: 0.03 AV: 1 NL: 2.16E5  
T: FTMS + p ESI Full lock ms [150.00-3000.00]

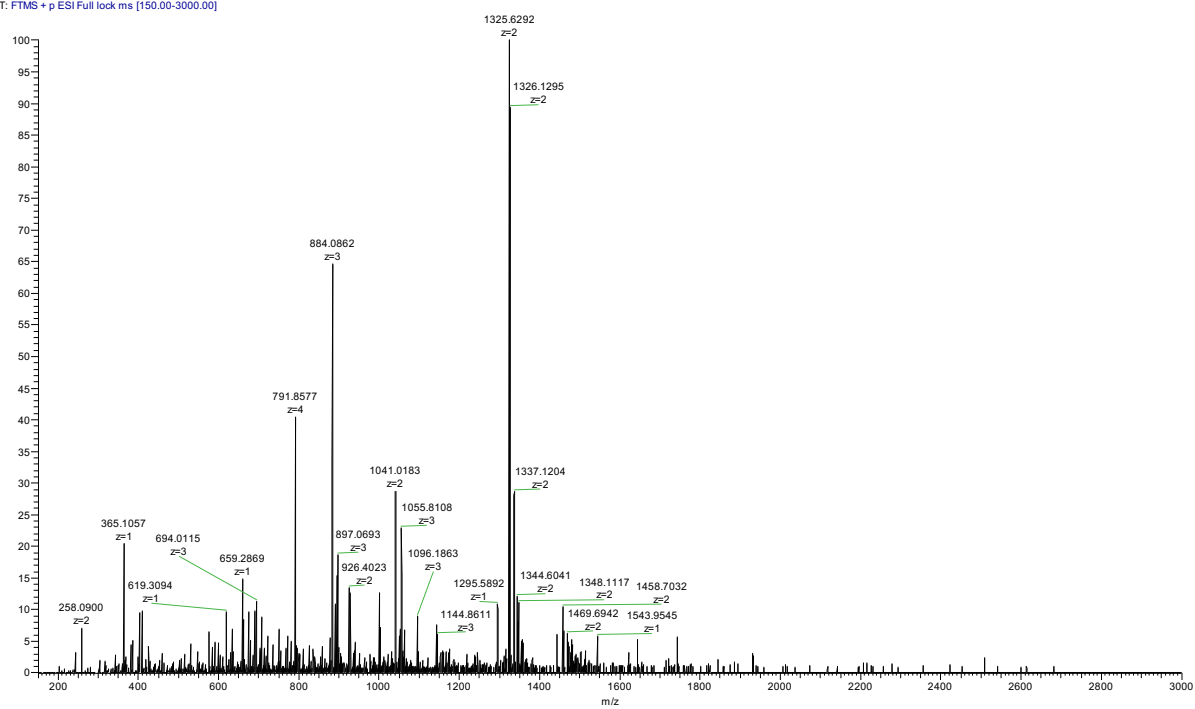

Figure S29. HR-ESI-MS of  $^{nat}\text{Ga-9}$ .
